# Supplementary material for: Efficient inhibition of African swine fever virus replication by CRISPR/Cas9 targeting of the viral p30 gene (CP204L)
Source: PubMed Central journal article supplement (PMC5780455; doi:10.1038/s41598-018-19626-1), 2018-01-23
Supplement: 41598_2018_19626_MOESM1_ESM.pdf [file 41598_2018_19626_MOESM1_ESM.pdf]

**Efficient inhibition of African swine fever virus replication by CRISPR/Cas9 targeting of the viral p30 gene (CP204L)**

Alexandra Hübner, Bjoern Petersen, Günther M. Keil, Heiner Niemann, Thomas C. Mettenleiter, and Walter Fuchs  
Friedrich-Loeffler-Institut, Greifswald – Insel Riems, Germany

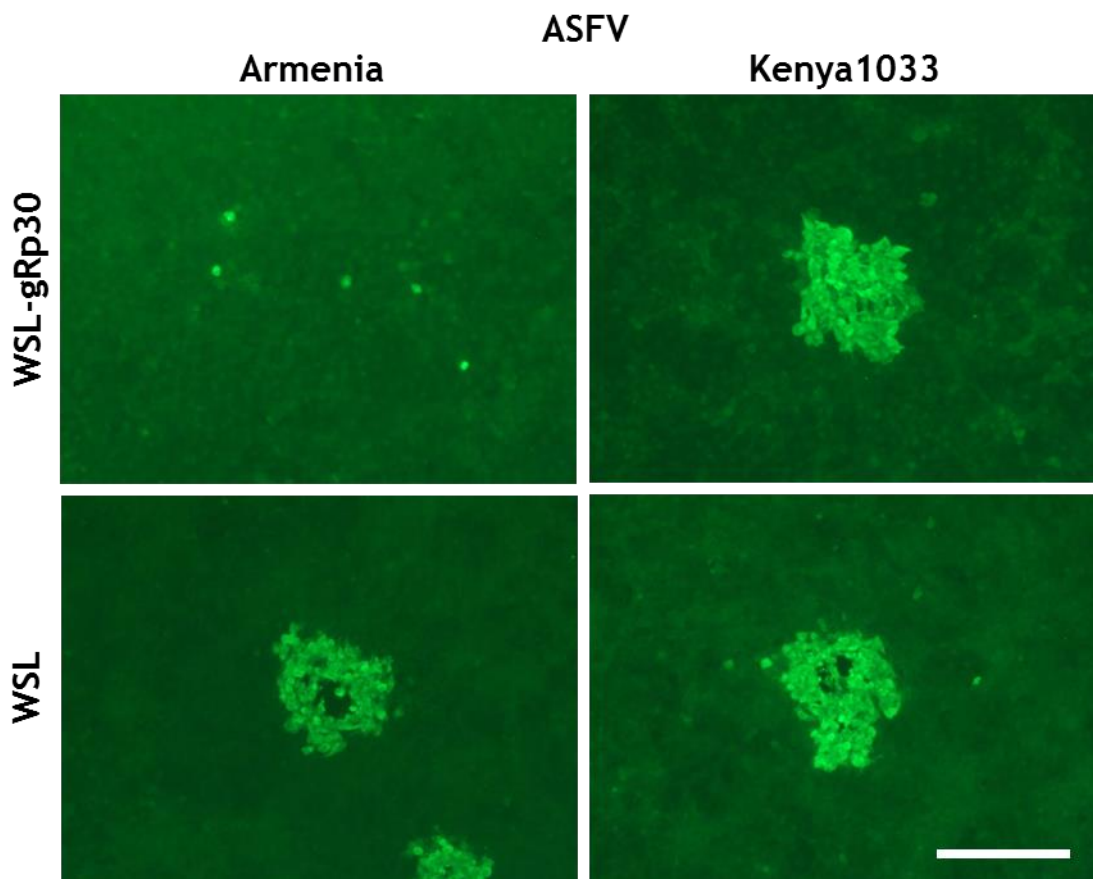

**Figure S1.** Indirect immunofluorescence analyses of WSL-gRp30 and WSL cell monolayers infected with ASFV-Armenia or ASFV-Kenya1033. The cells were fixed 5 days after infection with methanol-acetone (1:1), and subsequently incubated with a monospecific rabbit antiserum raised against a bacterially expressed fragment of the ASFV capsid protein p72 (amino acids 1 to 388), and Alexa-Fluor 488-conjugated anti-rabbit IgG (Thermo Fisher Scientific). Bar indicates 200  $\mu$ m.

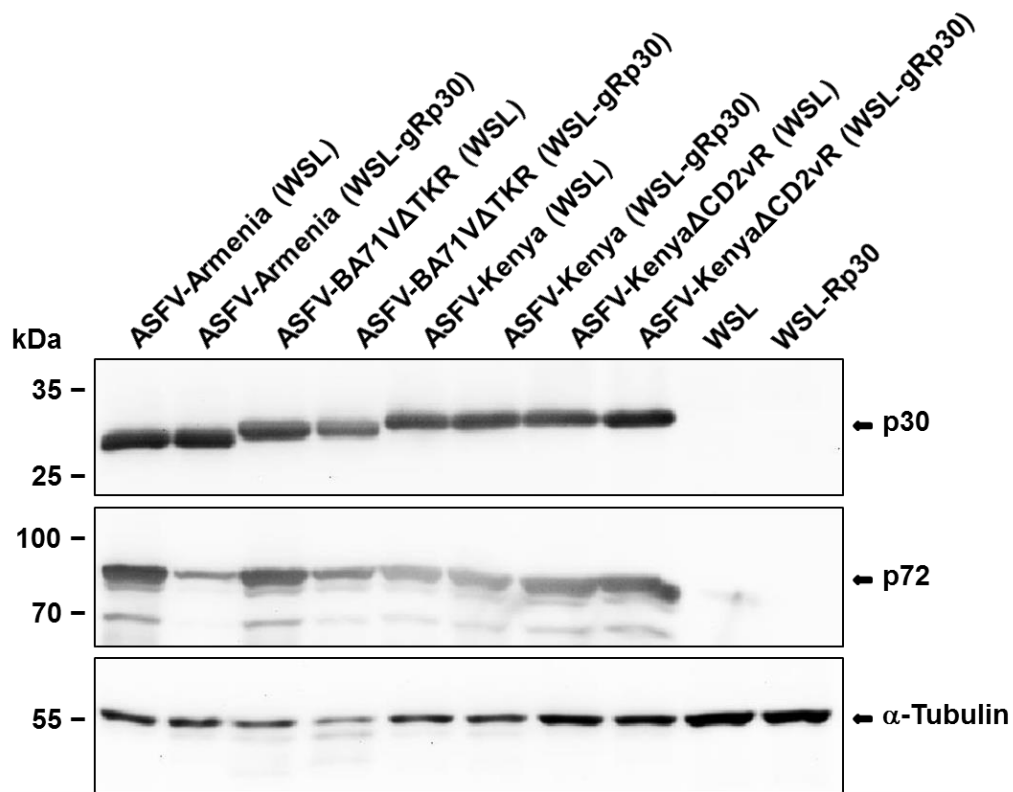

**Figure S2.** Western blot analyses of WSL-gRp30 and WSL cell lysates harvested 48 h after infection with ASFV-Armenia, ASFV-BA71VΔTKdsRed, ASFV-Kenya1033 or ASFV-Kenya1033ΔCD2vdsRed at a MOI of 5. Identical volumes (approx.  $10^4$  cells/lane) were separated on SDS polyacrylamide gels, and parallel blots were incubated with monospecific rabbit antisera raised against bacterially expressed ASFV p30 or p72, or a monoclonal antibody against  $\alpha$ -tubulin as loading control (Sigma-Aldrich). Antibody binding was detected by chemilumescence reactions of peroxidase-conjugated anti-rabbit or anti-mouse IgG (Jackson ImmunoResearch). Molecular masses of marker proteins are indicated.
